## ACTIONS OF SEX STEROIDS ON KISSPEPTIN EXPRESSION AND OTHER REPRODUCTION-RELATED GENES IN THE BRAIN OF THE TELEOST FISH EUROPEAN SEA BASS

Alvarado, M.V.<sup>1</sup>

Servili, A.<sup>2</sup>

Molés, G.<sup>1</sup>

Gueguen, M.M.<sup>3</sup>

Carrillo, M.<sup>1</sup>

Kah, O.<sup>3</sup>

and

Felip, A.<sup>1\*</sup>

**Keywords:** *kiss1/kiss2*, *gnrh-1*/gonadotropins, Feedback actions, Sex-steroids, Hypothalamus, Perciform

<sup>1</sup>Consejo Superior de Investigaciones Científicas (CSIC), Instituto de Acuicultura de Torre de la Sal, s/n. 12595 Ribera de Cabanes, Castellón, Spain. <sup>2</sup>Ifremer, Unité de Physiologie Fonctionnelle des Organismes Marins, LEMAR UMR 6539, BP 70, Plouzané 29280, France. <sup>3</sup>Research Institute in Health, Environment and Occupation. INSERM U1085, Université de Rennes 1, Campus de Beaulieu, Rennes, France.

\*Corresponding author: A. Felip. Consejo Superior de Investigaciones Científicas (CSIC), Instituto de Acuicultura de Torre de la Sal, s/n. 12595 Ribera de Cabanes, Castellón, Spain. E-mail address: [afelip@iats.csic.es](mailto:afelip@iats.csic.es) Tel.: +34-964-319500; Fax: +34-964-319509.

### Summary Statement

Kisspeptins are attributed to be key factors in mediating gonadal steroid feedback in mammalian hypothalamus and in the teleost fish sea bass, suggesting that this property is conserved across vertebrates.

## ABSTRACT

Kisspeptins are well known as mediators of the coordinated communication between the brain-pituitary axis and the gonads in many vertebrates. To test the hypothesis that gonadal steroids regulate *kiss1* and *kiss2* mRNA expression in European sea bass (a teleost fish), we examined the brains of gonad-intact (Control) and castrated animals, as well as castrated males (GDX) and females (OVX) that received testosterone (T) and estradiol (E<sub>2</sub>) replacement, respectively, during recrudescence. In GDX males, low expression of *kiss1* mRNA is observed by *in situ* hybridization in the caudal hypothalamus (CH) and the mediobasal hypothalamus (MBH), although hypothalamic changes in *kiss1* mRNA levels were not statistically different among the groups as revealed by real-time PCR. However, T strongly decreased *kiss2* expression levels in the hypothalamus, which was documented in the MBH and the nucleus of the lateral recess (NRLd) in GDX T-treated sea bass males. Conversely, it appears that E<sub>2</sub> evokes low *kiss1* mRNA in the CH, while there were cells expressing *kiss2* in the MBH and NRLd in these ovariectomized females. These results demonstrate that kisspeptin neurons are presumably sensitive to the feedback actions of sex steroids in the sea bass, suggesting that the MBH represents a major site for sex steroid actions on kisspeptins in this species. Also, recent data provide evidence that both positive and negative actions occur in key factors involved in sea bass reproductive function including changes in the expression of *gnrh-1*/gonadotropin, *cyp19b*, *er* and *ar* genes and sex steroid and gonadotropin plasma levels in this teleost fish.

## 1. Introduction

Kisspeptin has been found to play a key role in mediating gonadal steroid feedback to the GnRH neurons in the hypothalamus (Clarkson et al., 2010; Clarkson, 2013; Roa et al., 2008; Tena-Sempere, 2010). Evidence for this comes from castration and steroid replacement treatments carried out in rodents, sheep and primates and, to a lesser extent, in a few fish species (Kanda and Oka, 2013).

Castration in male rodents (Irwig et al., 2004; Smith et al., 2005a) and rhesus monkeys (*Macaca mulatta*, Zimmermann) (Shibata et al., 2007) is known to increase the expression of *Kiss1* mRNA in the arcuate nucleus (ARC) of the hypothalamus. Conversely, the transcriptional activity of *Kiss1* is decreased by testosterone (T), suggesting that *Kiss1* neurons play an active role in the negative feedback regulation of gonadotropin-releasing hormone (GnRH) and, in turn, gonadotropin secretion (luteinizing hormone, LH and follicle-stimulating hormone, FSH). Of note, in mice (*Mus musculus*, Linnaeus) (but not rats *Rattus rattus*, Linnaeus), *Kiss1* expressing neurons located in the hypothalamic anteroventral periventricular nucleus (AVPV) are reduced after castration and increase with T treatment (Kauffman et al., 2007; Smith et al., 2005a). Furthermore, estrogens influence the preovulatory LH surge observed in rodent females, indicating a positive feedback action of estradiol (E<sub>2</sub>) that is mediated by *Kiss1* neurons at the AVPV (Adachi et al., 2007; Kauffman et al., 2007; Smith et al., 2005b, 2006; Smith, 2009). Importantly, it appears to be mediated through kisspeptin fibers that make connections to GnRH neurons, thus allowing that kisspeptin regulates GnRH secretion and finally, the stimulation of LH secretion (Smith, 2009). Of note, it has been suggested that the regulation of *Kiss1* mRNA in mice occurs via androgen (AR) and estrogen (ER) receptors (Smith et al., 2005a). In the case of ewes, *Kiss1* neurons in the ARC participate in both the negative and positive feedback mechanisms exerted by sex steroids, and in-turn on the control of GnRH-LH secretion. Ovariectomy stimulates *Kiss1* expression, while estrogen replacement after castration prevents this effect. On the other hand, an elevated *Kiss1* expression in the ARC is observed prior to the preovulatory GnRH/LH surge, thus showing that kisspeptin cells are able to respond to the estrogen positive feedback signals during this stage of the follicular phase (Estrada et al., 2006; Smith et al., 2007).

Little information regarding kisspeptin gene regulation is available for fish; however, it is known that *kiss1* (but not *kiss2*) neurons are positively regulated by ovarian estrogen at the nucleus ventral tuberis (NVT) in medaka (*Oryzias latipes*,

Temminck and Schlegel) (Kanda et al., 2009; Mitani et al., 2010). Furthermore, *kiss2* neurons are sensitive to E<sub>2</sub> in zebrafish (*Danio rerio*, Hamilton) at the dorsal (Hd) and ventral (Hv) hypothalamus (Servili et al., 2011), and up-regulation of *kiss2* neurons by ovarian estrogens was found to occur in the preoptic area (POA) of goldfish (*Carassius auratus*, Linnaeus) (Kanda et al., 2012). In ovariectomized female striped bass (*Morone saxatilis*, Walbaum), T replacement reduces the expression of kisspeptins, although this steroidal feedback effect apparently depends on the maturational stage of the animals (Klenke et al., 2011).

Since the reproductive physiology of European sea bass (*Dicentrarchus labrax*, Linnaeus.) is well documented (Carrillo et al., 1995, 2009), this species has emerged as an interesting teleost model to investigate the differential involvement of the two kisspeptin systems in controlling fish reproduction (Alvarado et al., 2013; Escobar et al., 2013a,b; Felip et al., 2009, 2015; Migaud et al., 2013). This species exhibits a clear stimulation of gonadotropin release following systemic kisspeptin administration (Felip et al., 2009), and more recently, intracerebroventricular injections of Kiss2 have demonstrated the involvement of this peptide in neuroendocrine regulation of gonadotroph activity (Espigares et al., 2015). Furthermore, a very close correlation between the wide distribution of Kiss2-positive fibers and that of *kiss-R2*-expressing cells (also known as *gpr54-2b* or *kissr3*) has been observed in the hypothalamus (Escobar et al., 2013b). So far, the majority of *kiss-1* neurons in the rostral mediobasal hypothalamus (MBH) have been shown to express estrogen receptors, while *kiss-2* neurons have been detected very close to *erβ2* expressing cells, although no cells coexpressing *kiss-2* and *erβ2* mRNA were detected (Escobar et al., 2013a). In addition, it has been reported that neurons expressing somatostatin (SRIF), tyrosine hydroxylase (TH), neuropeptide Y (NPY) and neuronal nitric oxide (nNOS) synthase are targets for kisspeptins, but not GnRH-1 neurons, at least as direct targets of kisspeptins (Escobar et al., 2013b). In this context, the aim of the present work was to test the impact of T or E<sub>2</sub> implantation in early recrudescence male and female sea bass, respectively, on the expression of kisspeptin genes during the advanced recrudescence, depending on the physiological status of animals. Changes in the plasma levels of reproductive hormones and the expression of certain reproduction-related genes were also evaluated in groups of gonad-intact and castrated fish, as well as in castrated fish receiving steroid replacement.

## 2. Material and Methods

### 2.1. Animals

Adult male sea bass ( $n = 54$ ) of 2 years of age with an average body weight (BW) of 152.37 g and females ( $n = 48$ ) of 3–4 years of age with an average BW of 1034.5 g were obtained from stocks at the Instituto de Acuicultura de Torre de la Sal (IATS). All fish were individually tagged using passive integrative tags and maintained under natural photoperiod and temperature conditions at our facilities (IATS, Castellón, Spain, 40°N 0°E), where they were fed once a day.

### 2.2. Castration and steroid treatments

Fish were deeply anesthetized with 2-phenoxyethanol (0.5 ml/l of seawater) and the two gonads were dissected out through a 4–5-cm longitudinal incision in the abdominal cavity and sutured with a non-absorbable silk thread according to Crespo et al. (2013). For sham-operated fish (control), all steps were followed, except for the removal of the gonads. Operated fish were allowed to recover for 15 days, the sutures were removed and solid silastic implants (DowCorning, Midland, MI) prepared as previously described for sea bass (Zanuy et al., 1999) were administered via a small 2–3-mm incision in the abdomen in order to maintain high circulating steroid levels during seasonal gonadal development. Testosterone and estradiol were purchased from Sigma (St. Louis, MO). Males received one silastic implant, either empty or containing a T dose of 100  $\mu\text{g}$  per gram of fish, while 50  $\mu\text{g}$  of  $\text{E}_2$  per gram of fish were administered to females. The day on which the implants were inserted was considered to be the start of the experiments (day 0). All experimental procedures involving the care and use of live animals were carried out according to the guidelines for animal experiments established by Spanish Royal Decree RD 53/2013 and EU Directive 2010/63/EU. The local ethics committee (REGA-ES120330001055) approved this study.

### 2.3. Experimental design

Experiment 1. In mid October, coinciding with early testicular recrudescence (Carrillo et al., 1995), male sea bass (gonadosomatic index,  $\text{GSI} = 0.07 \pm 0.01\%$ ,  $n = 18$  fish per group) were either subjected to a sham-operation (testis intact, Control group), gonadectomized (GDX group), or gonadectomized with T replacement (GDX+T group) (Fig. 1A). From October to February, blood was periodically sampled for hormone

analysis (see below). After 105 days of the treatment (February), male fish ( $n = 6-8$  per group) were sacrificed. Examination of the gonads in the control fish indicated that males showed signs of gonadal recrudescence ( $GSI = 1.56 \pm 0.72\%$ ). Brains were collected and the pituitary was separated from the brain to permit dissection of the hypothalamus and telencephalon. All tissues were frozen on dry ice and stored at  $-80^{\circ}\text{C}$  until total RNA extraction. Changes in kisspeptin expression levels were evaluated by quantitative real-time PCR (qRT-PCR) in the whole hypothalamus and pituitary. Moreover, brains ( $n = 2$  per group) were collected for *in situ* hybridization (ISH). In addition, changes in kisspeptin receptor mRNA levels and other reproductive-related genes were also analyzed.

Experiment 2. In mid October, coinciding with the onset of vitellogenesis (Prat et al., 1999), female sea bass ( $GSI = 0.77 \pm 0.15\%$ ,  $n = 16$  fish per group) were either subjected to a sham-operation (ovary intact, Control group), ovariectomized (OVX group), or ovariectomized with  $E_2$  replacement (OVX+ $E_2$  group) (Fig. 1B). From October to December, blood was periodically sampled for subsequent hormone analysis, except for Lh levels, which were only measured at days 0, 30 and 60 after  $E_2$  implantation. After 60 days of treatment, female fish ( $n = 4-6$  per group) were sacrificed. Examination of the gonads in the control fish indicated that females showed signs of gonadal recrudescence ( $GSI = 4.88 \pm 0.89\%$ ). Brains were collected and processed as previously described in Experiment 1. Changes in kisspeptin expression levels were evaluated by quantitative real-time PCR (qRT-PCR) in hypothalamus and pituitary, while whole brains ( $n = 2$  per group) were collected for ISH. Changes in kisspeptin receptor mRNA levels and other reproduction-related genes were also analyzed. In this study, we observed that some changes in mRNA levels were not statistically different among groups. They are described throughout the text for comparison, although they were not included in the data shown.

## 2.4. Hormone analysis

Blood samples were collected during the light phase (at  $10:00 \pm 1$  hour) from the caudal vein. Plasma was separated by centrifugation at  $4^{\circ}\text{C}$  and stored at  $-20^{\circ}\text{C}$  until analysis. Hormonal levels were measured by conventional enzyme immunoassays as described by Rodríguez et al. (2000) for T, Rodríguez et al. (2001) for 11-KT, Molés et al. (2008) for  $E_2$ , Mateos et al. (2006) for Lh and Molés et al. (2012) for Fsh.

## 2.5. RNA isolation and reverse transcription for qRT-PCR

The procedure for RNA isolation and reverse transcription for qRT-PCR has been previously described by Alvarado et al. (2013). The gene-specific primers and Taqman fluorogenic probes used in this study to evaluate changes in the mRNA levels of the two kisspeptin genes and their receptors, as well as *gnrh-1/gnrhr-II-1a*, were those described in Alvarado et al. (2013). Changes in mRNA levels of gonadotropin genes (*fsh $\beta$* , *lh $\beta$* ) were evaluated using the procedures described by Felip et al. (2008), while changes in expression levels of reproductive-related genes were measured according to the method used by Blázquez et al. (2008) for *cyp19b* (i.e., the gene that encodes P450 aromatase that is expressed in brain, also named *cyp19A2*) and García-López et al. (2011) for *era* and *er $\beta$ 1*. Specific primers for *ar* (M.J. Mazón, Estudio de la función de la hormona estimuladora del folículo de la lubina: su implicación en la espermatogénesis y sus rutas de señalización intracelular/Analysis of the function of follicle stimulating hormone in the sea bass: Its involvement in the spermatogenesis and signalling pathway, PhD Thesis, University of Murcia, Spain 2014; <http://digitum.um.es/xmlui/handle/10201/42046>) and *er $\beta$ 2* (R. Rodríguez, A. Felip, S. Zanuy and M. Carrillo, unpublished data) were as follows: *ar* forward, CGG CTG AGG AGG TGT TTT GAA (200 nM); *ar* reverse, GTT TTT CTG TTG TCC AAT CTT CTT TAG TT (200 nM); *er $\beta$ 2* forward, GTG GAC TCC AGA CTC GGG AC (200 nM); *er $\beta$ 2* reverse, ATC ATG CTA GCC TCG GTG AAG (200 nM). PCR efficiency and amplicon size were 0.94 and 78 bp for the *ar* gene and 0.91 and 246 bp for the *er $\beta$ 2* gene, respectively. All standards and experimental samples were run in duplicate. The sea bass elongation factor-1 $\alpha$  (*ef1 $\alpha$* ) gene was used as a control gene (Alvarado et al., 2013; Rocha et al., 2009). Data were expressed as relative values of mRNA for each target gene/mRNA *ef1 $\alpha$*  (starting quantity mean  $\pm$  standard error of the mean, SEM). Negative controls were also run for each real-time experiment.

## 2.6. In situ hybridization (ISH)

The ISH procedure has been previously described by Servili et al. (2011) and Escobar et al. (2013a). The whole brain was sectioned at 8  $\mu$ m in 2 series of adjacent sections. All the slides of the two series were hybridized with probe for *kiss1* or *kiss2* mRNA detection, thus considering that one complete series of slides was representative of the all regions of the brain. The atlas of the European sea bass brain was used for the localization of *kiss1* and *kiss2*-expressing cells (Cerdá-Reverter et al., 2001a,b).



Micrographs were taken using an epifluorescence microscope (Olympus Provis) equipped with a DP71 digital camera. Images were then processed with Olympus Analysis Cell software and Photoshop CS4 (Adobe Systems, San Jose CA).

## 2.7. Statistical analysis

Data are represented as the mean  $\pm$  SEM. Hormonal and gene expression levels were analyzed by a two- and one-way ANOVA, respectively, and a Holm-Sidak test, which was used for multiple comparison tests. Prior to analysis, values for gene expression levels were ln-transformed to meet normality and homoscedasticity requirements. All analyses were conducted using SigmaStat version 3.0 (SYSTAT Software Inc., Richmond, CA). Differences were considered to be significant when  $P < 0.05$  (Sokal and Rohlf, 1981).

## 3. Results

### 3.1. Effects of castration and T replacement on plasma hormone levels in males

As expected, T plasma levels differed among the groups (Fig. 2A). While the control and GDX groups exhibited low circulating levels of T, castrated testosterone-implanted fish displayed higher levels, with a significant elevation 3 days after implantation and maximum values at day 7 ( $48.4 \pm 4.73$  ng ml<sup>-1</sup>). Levels subsequently decreased on day 15 and remained constant until day 90, before returning to basal levels at the end of experiment (day 105). Plasma 11-KT levels in the controls exhibited a significant increase on day 60 (December) and remained high during spermatogenesis (January), before dropping significantly on day 105 (February), which corresponds to full spermiation in this species (Fig. 2B). The GDX group exhibited low levels of circulating 11-KT ( $\leq 2.06$  ng ml<sup>-1</sup>), while the GDX+T group showed a significant elevation after 3 and 7 days of implantation, as compared to the control and GDX groups. Levels increased again on days 60 and 90, although they remained significantly lower than in the control animals. Conversely, plasma Lh levels in control males showed maximum values on day 15, during mid November ( $3.32 \pm 0.30$  ng ml<sup>-1</sup>), although they were not statistically different throughout the experiment (Fig. 2C). In GDX and GDX+T groups, the observed Lh levels were higher than those in the control group on day 0, they peaked on day 3 and then significantly dropped on day 7, to levels comparable to those of the control fish. These Lh levels remained low, with values around  $1.23 \pm 0.20$  ng ml<sup>-1</sup>, while T replacement maintained Lh levels fluctuating



around  $1.89 \pm 0.37 \text{ ng ml}^{-1}$ . Changes in plasma levels of Fsh throughout the experiment were bimodal in the controls. Plasma Fsh levels were high during early October (day 3), followed by a significant decline on day 7. A second increase in plasma Fsh levels was observed at the end of November (day 30), coinciding with mid-testicular growth in this species. These levels remained high in December and then decreased until low levels were reached at full spermiation (January-February) (Fig. 2D). It is interesting to note that the observed Fsh levels in the GDX and GDX+T groups showed a significant decrease after 3 days of implantation, as compared to the control group. Along the same lines, Fsh levels in these two groups significantly decreased on day 30, coinciding with the second increase in Fsh levels in the control group. The results showed that castrated sea bass reached circulating Fsh values of up to  $34.38 \pm 1.60 \text{ ng ml}^{-1}$ . Changes in plasma levels of Fsh in GDX+T showed an increase after 7 and 15 days of implantation, after which they proceeded to decrease.

### **3.2. Effects of castration and T replacement on the expression of *kiss/kissr* and *gnrh-1/gnrhr-II-1a* and gonadotropin genes in the brain of males**

Changes in hypothalamic *kiss1* mRNA levels were not statistically different among the groups after 105 days of implantation (Fig. 3A). However, T replacement after castration evoked a dramatic decrease in *kiss2* expression in the hypothalamus between GDX+T and GDX groups, while castrated males showed *kiss2* mRNA levels that were comparable to those of the control animals (Fig. 3B). An *in situ* hybridization was performed to evaluate whether castration and T replacement treatment had impacted the distribution of kisspeptin-expressing neurons in specific areas of the brain in male sea bass. Populations expressing *kiss1* could be identified in the mediobasal hypothalamus (MBH) (Fig. 4A-C) and caudal hypothalamus (CH) (Fig. 4D-F). Although *in situ* hybridization results were not statistically analysed because of the low number of processed samples per group, it is interesting to report that a decrease in the number of *kiss1* positive cells were constantly noted in all the brain sections containing the MBH and CH of GDX animals (see Fig. 4B and 4E for representative pictures, respectively). Of note, *kiss1* cells in the dorsal habenular nucleus (NHd) did not show sex steroid sensitivity. Conversely, cells expressing *kiss2* mRNA were observed in the MBH (Fig. 4G-I) and the dorsal part of the nucleus of the lateral recess (NRLd) (Fig. 4J-O). Interestingly, the counting of the total number of the *kiss2* expressing cells visualized by *in situ* hybridization in all the sections containing the MBH (Fig. 4I) as

well as the anterior (Fig. 4L) and posterior NRLd (Fig. 4M-O) would suggest a decrease of *kiss2* expression in these brain regions of the GDX+T group compared to control. *kiss2* expression in the preoptic area (POA) was unaffected by T. In addition, relative expression levels of kisspeptin receptors in the hypothalamus failed to show significant differences among groups. Neither *kiss2* nor kisspeptin receptor mRNA levels in the pituitary showed steroid sensitivity, while *kiss1* transcripts were undetected in this study. Furthermore, no changes in mRNA levels of hypothalamic *gnrh-1* (Fig. 3C) or pituitary *gnrhr-II-1a* genes were observed. No significant changes were detected in mRNA levels of *lhβ* (Fig. 3D), but *fshβ* mRNAs significantly decreased in GDX+T (Fig. 3E).

### 3.3. Effects of castration and T replacement on the expression of *cyp19b*, *ar* and *er* genes in males

While no changes in hypothalamic *cyp19b* mRNA levels were detected among groups (data not shown), expression levels in the telencephalon were significantly increased by T after castration (Fig. 5A). Furthermore, hypothalamic *ar* expression significantly increased in GDX, while T replacement after GDX showed similar mRNA levels to those of the control group (Fig. 5B). Interestingly, we observed that *erβ1* mRNA levels (Fig. 5C) significantly increased in the hypothalamus in castrated males after T treatment, although no changes in *erα* and *erβ2* mRNAs were observed. At the pituitary level, GDX decreased *cyp19b* expression, while T replacement after GDX stimulated its expression to a level that was comparable to that of the control fish (Fig. 5D). Castration caused a significant decrease in *erα* expression that was restored by T (Fig. 5E). No differences in pituitary *ar*, *erβ1* and *erβ2* mRNAs were observed among the groups. It should be noted that *er* gene expression levels in the pituitary were higher than those in the hypothalamus ( $10^3$ - to  $10^4$ -fold).

### 3.4. Effects of castration and E<sub>2</sub> replacement on plasma hormone levels in females

Circulating E<sub>2</sub> levels differed among the groups (Fig. 6A). While the control and OVX groups exhibited low circulating levels of E<sub>2</sub>, post-ovariectomy estradiol-implanted fish displayed higher levels of this steroid, with an increase 3 days following implantation and maximum values at day 7 ( $15.4 \pm 2.04$  ng ml<sup>-1</sup>). These levels remained high on day 15 and then decreased to circulating levels of around  $1.87 \pm 0.37$

ng ml<sup>-1</sup>. Lh levels measured on day 30 and 60 after treatment showed no significant differences among the groups (Fig. 6B). Conversely, control females exhibited plasma Fsh levels of around  $25.4 \pm 0.79$  ng ml<sup>-1</sup>, and ovariectomy significantly increased circulating Fsh levels up to  $108.79 \pm 11.46$  ng ml<sup>-1</sup>. Treatment with E<sub>2</sub> significantly decreased Fsh (Fig. 6C).

### 3.5. Effects of castration and E<sub>2</sub> replacement on the expression of *kiss/kissr* and *gnrh-1/gnrhr-II-1a* and gonadotropin genes in the brain of females

Changes in hypothalamic *kiss1* and *kiss2* mRNA levels were not statistically different among the groups after 60 days of implantation (Fig. 7A-B). *In situ* hybridization in females revealed *kiss1* expression in the MBH and the CH. Although E<sub>2</sub> replacement after OVX had no effect on *kiss1* expression in the MBH (data not shown), the counting of the total number of the *kiss1* expressing cells visualized by *in situ* hybridization in the CH (Fig. 8A-C) would suggest an decrease of *kiss1* expression in this brain region of female sea bass. On the other hand, cells expressing *kiss2* mRNA were detected in the MBH (Fig. 8D-F) and NRLd (Fig. 8G-I). In OVX animals the number of *kiss2* expressing cells were constantly reduced in all setions including the regions of the MBH (Fig. 8E) and NRLd (Fig. 8H), while estrogen replacement after OVX prevented this effect in both MBH (Fig. 8F) and NRLd (Fig. 8I) regions. E<sub>2</sub> had no effect on *kiss2* expression in the POA in ovariectomized sea bass. Furthermore, no changes in kisspeptin receptor mRNA levels were observed in any of the groups. Neither pituitary *kiss2* nor kiss receptor mRNA levels showed steroid sensitivity and *kiss1* transcripts were undetectable. We found that OVX elicited a significant elevation of *gnrh-1* expression in the hypothalamus (Fig. 7C), while OVX+E<sub>2</sub> and controls showed comparable mRNA levels. No significant variations in pituitary *gnrhr-II-1a* and *lhβ* (Fig. 7D) expression levels were observed among the groups, although *fshβ* transcripts significantly increased in OVX fish as compared to the OVX+E<sub>2</sub> group (Fig. 7E).

### 3.6. Effects of castration and E<sub>2</sub> replacement on *er* mRNA expression in females

OVX increased hypothalamic *erα* (Fig. 9A), *erβ1* (Fig. 9B) and *erβ2* (Fig. 9C) mRNA levels as compared to the control group, although not to levels that were statistically different from OVX+E<sub>2</sub>. In the pituitary, castration significantly increased *erβ2* expression and E<sub>2</sub> replacement after OVX prevented this effect (Fig. 9D), but no

changes in *erα* and *erβ1* were observed among groups. As in males, pituitary estrogen receptor mRNA levels were higher than those in the hypothalamus ( $10^3$ - to  $10^4$ -fold) in females.

#### 4. Discussion

This study examined the impact of castration and steroid replacement on the expression of the kisspeptin genes, as well as the potential relationships with other key reproductive parameters in adult sea bass (Table 1). After the gonads were properly removed, steroid analysis revealed the expected steroid plasma elevations following implantation. In order to establish the influence of long-term castration and understand the brain level at which steroids act, its potential role in the hypothalamus and pituitary was explored by analyzing changes in the expression levels of two kisspeptin genes, as well as of key reproductive-related genes (*gnrh-1/gnrhr-II-1a* pair, gonadotropin, *ar*, *er* and *cyp19b*) at one endpoint, once the implants were exhausted coinciding with recrudescence. The distribution and steroid regulation of kisspeptin-expressing neurons was also explored in this teleost fish species. Our findings show that kisspeptin neurons apparently exhibit sensitivity to sex steroids in sea bass, thus supporting the idea that this property is conserved among vertebrates (Oakley et al., 2009; Kanda and Oka, 2013). However, in order to better interpret these results, a number of issues should be considered for future experiments, including the possibility of using a second implant or distinct doses that might maintain plasma elevations of the expected steroid throughout the time course of the experiment, the time of sampling and a larger sample size to confirm these findings. Accordingly, due to circulating levels of T and E<sub>2</sub> were maximum 7 days after implantation in this study, in further studies would be interesting to analyze the impact of steroid administration at this sampling point, at least on the expression levels of two kisspeptin genes, in the experimental groups for comparison with the results of this work. All in all, to the extent of our knowledge, this is the first time that a negative feedback action of T on hypothalamic *kiss2* expression has been reported in a male adult fish. Here, we show that T replacement after castration decreases *kiss2* mRNA expression in the MBH and NRLd of male sea bass, while distribution of *kiss2* mRNA was found readily identifiable in these regions of the hypothalamus in GDX animals. According these findings, further studies will be needed to elucidate if T effects are or not due to its aromatization to E<sub>2</sub> in GDX+T by using aromatase inhibitors and/or non-aromatizable androgens. On the other hand, the

number of hypothalamic *kiss1* positive cells visualized by *in situ* hybridization in all the sections containing the CH and MBH of GDX+T would suggest a positive steroid feedback in these brain regions, although these observations were not statistically confirmed by relative mRNA expression levels. One possible explanation for the differences between qRT-PCR and ISH analysis could be a dilution effect due to the use of whole hypothalamus for qRT-PCR method, as ISH only reveals those specific kisspeptin cells in restricted hypothalamic nuclei. Our results reveal that MBH presumably represents a major site for sex steroid actions on kisspeptins in fish, as this brain region shows a noticeable sex steroid sensitivity of kisspeptin cells. Furthermore, the MBH appears to be responsible for both positive and negative feedback actions, at least in sea bass males. In this context, steroid-induced regulation of kisspeptin expression in the MBH of sea bass would be comparable to steroidal control of *Kiss1* expression in the ARC of female sheep (ewes), it may also mediate both feedback signals (Estrada et al., 2006; Smith et al., 2007). Conversely, kisspeptin cells in the POA appear to lack sex steroid sensitivity in sea bass. The interpretation of the results in females was not so straightforward and several causes, as previously discussed, probably contributed to this situation. In medaka, only *kiss1* neurons in the nucleus ventralis tuberis (NVT) are positively regulated by ovarian estrogens via their coexpressed *erα* (Kanda et al., 2009), while estrogen treatment of juvenile zebrafish causes an increase in *kiss1* expression, although the effects on *kiss2* neurons were much more pronounced (Servili et al., 2011). However, it should be noted that *kiss2* expression is up-regulated by E<sub>2</sub> only in the POA of goldfish, showing colocalisation with all three types of *er* genes (Kanda et al., 2012). Recent work in female striped sea bass suggested that the kisspeptin system is not under gonadal control during early recrudescence; however, T treatment during mid-vitellogenesis reduces *kiss1* and *kiss2* expression, suggesting a negative steroidal feedback effect on this system in females (Klenke et al., 2011). Studies in mammals have established that only *Kiss1* neurons (the *Kiss2* gene was lost during the evolution of vertebrates (Akazome et al., 2010; Felip et al., 2009) mediate both negative and positive sex steroid feedback effects involving distinct hypothalamic nuclei, which are practically confined to the ARC and AVPV nuclei, respectively (Kanda and Oka, 2013). Regarding to steroid feedback actions on kisspeptin receptors, this study provides that sea bass kisspeptin receptor expression levels in the hypothalamus are unaffected by steroids. However, it has been reported that estradiol causes an increase in kiss receptors in zebrafish (Servili et al.,

2011), while T-replacement reduces the transcript levels in striped sea bass (Klenke et al., 2011). Comparisons between primates and rodents show that a lack of response to sex steroids occurs at the kiss receptor in the male monkeys (Shibata et al., 2007), while in rats, T influences *Kissr* mRNA levels following castration and steroid replacement (Navarro et al., 2004). Accordingly, some factors such as sex, gonadal stage and species (among others) are likely to influence the regulatory response of kisspeptin gene (Kitahashi and Parhar, 2013).

On the other hand, studies in mammals have also documented the close anatomical relationships between the *Kiss1* and *Gnrh-1* neurons, leading to the notion that Kiss1 neurons mediate the feedback signal from the gonad to GnRH (Bellefontaine et al., 2011; Oakley et al., 2009; Prevot, 2002; Radovick et al., 2012). However, in teleost fish, with the exception of one cichlid fish (Parhar et al., 2004), data from zebrafish (Servili et al., 2011), medaka (Kanda et al., 2012) and sea bass (Escobar et al., 2013b) all failed to confirm the presence of kiss receptors in *gnrh* neurons. Importantly, this situation suggests that other neurons distinct to those of *Gnrh-1* are direct targets for kisspeptins. The present work shows that testosterone does not modify *gnrh-1/gnrhr-II-1a* transcript levels in GDX, suggesting the lack of any effect of sex steroids on the *gnrh-1* gene expression, at least, at the hypothalamus level during recrudescence in male sea bass. These results are in line with those recently reported on this species, which show that *gnrh-1* mRNA levels in the hypothalamus of males fluctuate during different gonadal stages (Alvarado et al., 2013), most likely in order to maintain several batches of gametes in the testes undergoing spermatogenesis during a long spawning season in this teleost fish (Carrillo et al., 1995). Interestingly, changes in kisspeptin expression in this species are not apparently associated with those of *gnrh* system and gonadotropins when the whole brains (Migaud et al., 2013) or the hypothalamus (Alvarado et al., 2013) have been analyzed. Recently, *in vivo* studies in males of this fish species have demonstrated that intracerebroventricular injection of Kiss2 evokes a marked effect on *gnrh-1* expression levels at the forebrain-midbrain, while it does not affect the expression of this *gnrh* form in the hypothalamus, thus suggesting that, at leasts, a differential involvement of the neuroendocrine areas of the forebrain-midbrain and the hypothalamus exists in the control of the reproductive axis via Kiss2/*Gnrh1* in male sea bass (Espigares et al., 2015). Additionally, this work has provided evidence of Kiss2/*Gnrh-1* system modulates the activity of gonadotrophs involving the neuroendocrine areas of the forebrain-midbrain (Espigares et al., 2015). Since



testosterone is an aromatizable androgen and fish present the highest levels of brain aromatase activity in vertebrates (Callard et al., 1990; Diotel et al., 2010), changes in *cyp19b* expression levels were analyzed. The high *cyp19b* mRNA levels in the brain of male sea bass parallel reduced *ar* mRNA expression in the hypothalamus and increased transcriptional activity of hypothalamic *erβ1* and pituitary *erα* in GDX+T. Although it cannot be determined whether T exerts its effects by itself or after aromatization into estradiol, these data suggest that T effects could be aromatase-dependent in this teleost fish species. The effects of E<sub>2</sub> showed that hypothalamic and pituitary estrogen receptors (*era* and *erβ*) were sensitive to estrogens. Currently, no information exists about the presence of *ar* coexpression in sea bass kisspeptin neurons, although it has been reported that most *kiss1* mRNA-containing cells in the MBH express both *erα* and *erβ2* (Escobar et al., 2013a). Furthermore, it seems that *kiss2*-expressing cells are close to *erβ2*-expressing cells in the MBH, although no co-expression has been observed with *erα* and *erβ1* (Escobar et al., 2013a). Thus, further studies will be needed to determine whether these effects are directly mediated in kisspeptins neurons or other steroid-sensitive neurons are involved or certain chemical transmitters interact with hypothalamic neuropeptides, such as kisspeptins. In this context, an increasing body of evidence supports the idea that GnRH neurons in mammals are regulated by distinct neuronal networks and interactions via specific cell-cell signalling molecules, which may be affected by the modulatory influence of gonadal steroids (Bellefontaine et al., 2011; Prevot, 2002; Radovick et al., 2012). In mice, nitric oxide (NO) is likely involved in mediating the estrogenic positive feedback of *Kiss1* onto GnRH neurons (Hanchate et al., 2012). Recent data in sea bass have shown that *kissr2* (also referred to as *gpr54-2b* or *kissr3*) is expressed in NO positive cells (Escobar et al., 2013b), although its potential interaction with kisspeptins and the mediation of steroid feedback is still unknown.

Finally, studies in salmonids provide evidence that both positive and negative actions occur in the control of gonadotropins after gonadectomy (Antonopoulou et al., 1999; Borg et al., 1998; Larsen and Swanson, 1997). The present study shows that an inhibitory action of T and E<sub>2</sub> occurs on *fshβ* mRNA levels in sea bass, as previously reported in this species (Mateos et al., 2002). Thus, a combination of several mechanisms of action of sex steroids on the gonadotropic function might be considered including, the effect of steroids at the level of the pituitary, the hypothalamus or both. In addition, these results indicate that while hypothalamic *kiss2* mRNA levels are



significantly suppressed in males, they show a positive trend in females. This suggests that transcriptional regulation of the *kiss2* gene can be presumably exerted through several functional mechanisms. Moreover, no changes in mRNA *lhβ* levels were observed in adult sea bass, although they are known to slightly increase at rest (Mateos et al., 2002). Thus, it confirms that steroids exert different effects, depending on the gonadal stage of the animals. Finally, the fact that T and E<sub>2</sub> decrease the baseline levels of circulating Fsh (~ 3-4 fold) and, to a lesser extent, Lh in castrated fish, demonstrates a negative action of steroids on gonadotropin release in adult sea bass, as occurs in other fish (Antonopoulou et al., 1999; Saligaut et al., 1998). These findings therefore provide evidence of the involvement of hypothalamic kisspeptin neurons in long steroidal regulatory feedback on pituitary function in sea bass, adding further evidence of the role of kisspeptins in controlling vertebrate reproduction.

## Acknowledgments

We would like to thank Animal Husbandry and Histological Services at IATS for technical assistance with the animals and histology, respectively. We also thank S. Ibañez for her assistance with immunoassays and M.J Mazón and R. Rodríguez for their assistance in the qRT-PCR process for *ar* and *erβ2*, respectively.

## Competing interests

The authors declare no competing or financial interests.

## Author contributions

All co-authors have checked and confirmed their contribution to manuscript. A.F., M.C. and M.V.A conceived and designed the study. M.V.A., A.F. M.C. and G.M. collected and analyzed the data. M.V.A., A.S., M.M.G. and O.K. analyzed the ISH data. M.V.A. and A.F. interpreted the data and wrote the manuscript.

## Funding

This work was supported by the Spanish Ministry of Science and Innovation (MICINN) and the Spanish Ministry of Economy and Competitiveness (MINECO) [AGL2009-11086 KISSCONTROL to A.F. and M.C., CSD2007-00002 AQUAGENOMICS to S.Z.]; the Regional Government of Valencia [REPROBASS; PROMETEOII/2014/051 to S.Z.] and the EU [FP7-222719 LIFECYCLE to S.Z.]. M.V. Alvarado was supported by the MICINN and MINECO (Spain) [AGL2010-036443 FPI fellowship].

## References

- Adachi, S., Yamada, S., Takatsu, Y., Matsui, H., Kinoshita, M., Takase, K., Sugiura, H., Othaki, T., Matsumoto, H., Uenoyama, Y. et al.** (2007). Involvement of anteroventral periventricular metastin/kisspeptin neurons in estrogen positive feedback action on luteinizing hormone release in female rats. *J. Reprod. Dev.* **53**(2), 367-378.
- Akazome, Y., Kanda, S., Okubo, K. and Oka, Y.** (2010). Functional and evolutionary insights into vertebrate kisspeptin systems from studies of fish brain. *J. Fish. Biol.* **76**, 161-182.
- Alvarado, M.V., Carrillo, M. and Felip, A.** (2013). Expression of kisspeptins and their receptors, *gnrh-I/gnrhr-II-1a* and gonadotropin genes in the brain of adult male and female European sea bass during different gonadal stages. *Gen. Comp. Endocrinol.* **187**, 104-116.
- Antonopoulou, E., Swanson, P., Mayer, I. and Borg, B.** (1999). Feedback control of gonadotropins in Atlantic salmon, *Salmo salar*, male parr. II. Aromatase inhibitor and androgen effects. *Gen. Comp. Endocrinol.* **114**, 142-150.
- Bellefontaine, N., Hanchate, N.K., Parkash, J., Campagne, C., de Sereaanno, S., Clasadonte, J., d'Anglemon de Tassigny, X. and Prevot, V.** (2011). Nitric oxide as key mediator of neuron-to-neuron and endothelia-to-glia communication involved in the neuroendocrine control of reproduction. *Neuroendocrinology.* **93**, 74-89.
- Blázquez, M., González, A., Papadaki, M., Mylonas, C. and Piferrer, F.** (2008). Sex-related changes in estrogen receptors and aromatase gene expression and enzymatic activity during early development and sex differentiation in the European sea bass (*Dicentrarchus labrax*). *Gen. Comp. Endocrinol.* **158**(1), 95-101.

**Borg, B., Antonopoulou, E., Mayer, I., Andersson, E., Berglund, I. and Swanson, P.** (1998). Effects of gonadectomy and androgen treatments on pituitary and plasma levels of gonadotropins in mature male Atlantic salmon, *Salmo salar*, parr-Positive feedback control of both gonadotropins. *Biol. Reprod.* **58**, 814-820.

**Callard, G.V., Schlinger, B.A. and Pasmanik, M.** (1990). Non-mammalian vertebrate models in studies of brain-steroid interactions. *J. Exp. Biol.* **4**, 6-16.

**Carrillo, M., Zanuy, S., Prat, F., Cerdá, J., Ramos, J., Mañanós, E. and Bromage, N.** (1995). Sea bass (*Dicentrarchus labrax*). In *The Broodstock management and egg and larval quality* (ed. N.R Bromage and R.J. Roberts), pp. 138-168. Oxford: Blackwell Science.

**Carrillo, M., Zanuy, S., Felip, A., Bayarri, M.J., Molés, G. and Gómez, A.** (2009). Hormonal and environmental control of puberty in perciform fish: The case of sea bass. *Trends in Comp. Endocrinol. and Neurobiol. Ann. NY Acad. Sci.* **1163**, 49-59.

**Cerdá-Reverter, J.M., Zanuy, S. and Muñoz-Cueto, J. A.** (2001a). Cytoarchitectonic study of the brain of a perciform species, the sea bass (*Dicentrarchus labrax*). I. The telencephalon. *J. Morphol.* **247**(3), 217-228.

**Cerdá-Reverter, J.M., Zanuy, S. and Muñoz-Cueto, J.A.** (2001b) Cytoarchitectonic study of the brain of a perciform species, the sea bass (*Dicentrarchus labrax*). II. The diencephalon. *J. Morphol.* **247**(3), 229-251.

**Clarkson, J., Han, S.K., Liu, X., Lee, K. and Herbison, A.E.** (2010) Neurobiological mechanisms underlying kisspeptin activation of gonadotropin-releasing hormone (GnRH) neurons at puberty. *Mol. Cell. Endocrinol.* **324**, 45-50.

**Clarkson, J.** (2013) Effects of estradiol on kisspeptin neurons during puberty. *Front. Neuroendocrinol.* **34**, 120-131.

**Crespo, B., Gómez, A., Mazón, M.J., Carrillo, M. and Zanuy, S.** (2013). Isolation and characterization of Ff1 and Gsdf family genes in European sea bass and identification of early gonadal markers of precocious puberty in males. *Gen. Comp. Endocrinol.* **191**, 155-167.

**Diotel, N., Le Page, Y., Mouriec, K., Tong, S.K., Pellegrini, E., Vaillant, C., Anglade, I., Brion, F., Pakdel, F., Chung, B.C. et al.** (2010). Aromatase in the brain of teleost fish: expression, regulation and putative functions. *Front. Neuroendocrinol.* **31**(2), 172-92.

**Escobar, S., Felip, A., Gueguen, M.M., Zanuy, S., Carrillo, M., Kah, O. and Servili, A.** (2013a). Expression of kisspeptins in the brain and pituitary of the European sea bass (*Dicentrarchus labrax*). *J. Comp. Neurol.* **521**, 933-948.

**Escobar, S., Servili, A., Espigares, F., Gueguen, M.M., Brocal, I., Felip, A., Gómez, A., Carrillo, M., Zanuy, S. and Kah, O.** (2013b) Expression of kisspeptins and kiss receptors suggests a large range of functions for kisspeptin systems in the brain of the European sea bass. *Plos One.* **8**(7) e70177.

**Espigares, F., Carrillo, M., Gómez, A. and Zanuy, S.** (2015). The forebrain-midbrain acts as functional endocrine signaling pathway of Kiss2/Gnrh1 system controlling the gonadotroph activity in the teleost fish European sea bass (*Dicentrarchus labrax*). *Biol. Reprod.* **92**(3), 70 1-13.

**Estrada, K.M., Clay, C.M., Pompolo, S., Smith, J.T. and Clarke, I.J.** (2006). Elevated KiSS-1 expression in the arcuate nucleus prior to the cyclic preovulatory gonadotropin-releasing hormone/lutenising hormone surge in the ewe suggests a stimulatory role for kisspeptin in oestrogen-positive feedback. *J. Neuroendocrinol.* **18**(10), 806-809.

**Felip, A., Zanuy, S., Muriach, B., Cerdá-Reverter, J.M. and Carrillo, M.** (2008). Reduction of sexual maturation in male *Dicentrarchus labrax* by continuous light both before and during gametogenesis regimes. *Aquaculture.* **275**, 347-355.

**Felip, A., Zanuy, S., Pineda, R., Pinilla, L., Carrillo, M., Tena-Sempere, M. and Gómez, A.** (2009). Evidence for two distinct KiSS genes in non-placental vertebrates that encode kisspeptins with different gonadotropin-releasing activities in fish and mammals. *Mol. Cell. Endocrinol.* **312**, 61-71.

**Felip, A., Espigares, F., Zanuy, S., and Gómez, A.** (2015). Differential activation of kiss receptors by Kiss1 and Kiss2 peptides in the sea bass. *Reproduction.* **150**(3), 227-243.

**García-López, Á., Sánchez-Amaya, M.I., Tyler, C.R. and Prat, F.** (2011). Mechanisms of oocyte development in European sea bass (*Dicentrarchus labrax* L.): investigations via application of unilateral ovariectomy. *Reproduction.* **142**(2), 243-253.

**Hanchate, N.K., Parkash, J., Bellefontaine, N., Mazur, D., Colledge, W.H., d'Anglemont de Tassigny, X. and Prevot, V.** (2012). Kisspeptin-GPR54 signaling in mouse NO-synthesizing neurons participates in the hypothalamic control of ovulation. *J. Neurosci.* **32**(3), 932-945.

**Irwig, M.S., Fraley, G.S., Smith, J.T., Acohido, B.V., Popa, S.M., Cunningham, M.J., Gottsch, M.L., Clifton, D.K. and Steiner, R.A.** (2004). Kisspeptin activation of gonadotropin releasing hormone neurons and regulation of *KiSS-1* mRNA in the male rat. *Neuroendocrinology.* **80**, 264–272.

**Kanda, S., Akazome, Y., Matsunaga, T., Yamamoto, N., Yamada, S., Tsukamura, H., Maeda, K. and Oka, Y.** (2009). Identification of KiSS-1 product kisspeptin and steroid-sensitive sexually dimorphic kisspeptin neurons in medaka (*Oryzias latipes*). *Endocrinology.* **149**(5), 2467-2476.

**Kanda, S., Karigo, T. and Oka, Y.** (2012). Steroid sensitive *kiss2* neurones in the goldfish: Evolutionary insights into the duplicate kisspeptin gene-expressing neurones. *J. Neuroendocrinol.* **24**(6) 897-906. (doi: 10.1111/j.1365-2826.2012.02296.x)

**Kanda, S. and Oka, Y.** (2013). Structure, synthesis, and phylogeny of kisspeptin and its receptor. In *Kisspeptin signaling in reproductive biology* (ed. A.S Kauffman and T.J Smith TJ), pp. 9-25. Springer, Germany.

**Kauffman, A.S., Gottsch, M.L., Roa, J., Byquist, A.C., Crown, A., Clifton, D.K., Hoffman, G.E., Steiner, R. and Tena-Sempere, M.** (2007). Sexual differentiation of *Kiss1* gene expression in the brain of the rat. *Endocrinology*. **148**(4), 1774-1783.

**Kitahashi, T. and Parhar, I.** (2013). Comparative aspects of kisspeptin gene regulation. *Gen. Comp. Endocrinol.* **181**, 197-202.

**Klenke, U., Zmora, N., Stubblefield, J. and Zohar, Y.** (2011). Expression patterns of the kisspeptin system and GnRH1 correlate in their response to gonadal feedback in female striped bass. *Indian J. Sci. Technol.* **4**(S8), 33-34.

**Larsen, D.A. and Swanson, P.** (1997). Effects of gonadectomy on plasma gonadotropins I and II in coho salmon, *Oncorhynchus kisutch*. *Gen. Comp. Endocrinol.* **108**, 152-160.

**Mateos, J., Mañanós, E., Carrillo, M. and Zanuy, S.** (2002). Regulation of follicle-stimulating hormone (FSH) and luteinizing hormone (LH) gene expression by gonadotropin-releasing hormone (GnRH) and sexual steroids in the Mediterranean sea bass. *Comp. Biochem. Physiol. B. Biochem. Mol. Biol.* **132**, 75-86.

**Mateos, J., Mañanós, E., Swanson, P., Carrillo, M. and Zanuy, S.** (2006). Purification of luteinizing hormone (LH) in the sea bass (*Dicentrarchus labrax*) and development of a specific immunoassay. *Cienc. Mar.* **32**(2), 271-283.

**Migaud, H., Ismail, R., Cowan, M. and Davie, A.** (2013). Kisspeptin and seasonal control of reproduction in male European sea bass (*Dicentrarchus labrax*). *Gen. Comp. Endocrinol.* **179**, 384-399.



**Mitani, Y., Kanda, S., Akazome, Y., Zempo, B. and Oka, Y.** (2010). Hypothalamic Kiss1 but not Kiss2 neurons are involved in estrogen feedback in medaka (*Oryzias latipes*). *Endocrinology*. **151**(4), 1751-1759.

**Molés, G., Gómez, A., Rocha, A., Carrillo, M. and Zanuy, S.** (2008). Purification and characterization of follicle-stimulating hormone from pituitary glands of sea bass (*Dicentrarchus labrax*). *Gen. Comp. Endocrinol.* **158**(1), 68-76.

**Molés, G., Gómez, A., Carrillo, M. and Zanuy, S.** (2012). Development of a homologous enzyme-linked immunosorbent assay for European sea bass FSH. Reproductive cycle plasma levels in both sexes and in yearling precocious and non-precocious males. *Gen. Comp. Endocrinol.* **176**, 70-78.

**Navarro, V.M., Castellano, J.M., Fernández-Fernández, R., Barreiro, M.L., Roa, J., Sánchez-Criado, J.E., Aguilar, E., Dieguez, C., Pinilla, L. and Tena-Sempere, M.** (2004). Developmental and hormonally regulated messenger ribonucleic acid expression of KiSS-1 and its putative receptor, GPR54, in rat hypothalamus and potent luteinizing hormone-releasing activity of KiSS-1 peptide. *Endocrinology*. **145**, 4565-4574.

**Oakley, A.E., Clifton, D.K. and Steiner, R.A.** (2009). Kisspeptin signaling in the brain. *Endocr. Rev.* **30**, 713-743.

**Parhar, I.S., Ogawa, S. and Sakuma, Y.** (2004). Laser-captured single digoxigenin-labeled neurons of gonadotropin-releasing hormone types reveal a novel G protein-coupled receptor (Gpr54) during maturation in cichlid fish. *Endocrinology*. **145**, 3613-3618.

**Prat, F., Zanuy, S., Bromage, N. and Carrillo, M.** (1999). Effects of constant short and long photoperiod regimes on the spawning performance and sex steroid levels of female and male sea bass. *J. Fish Biol.* **54**, 125-137.

**Prevot, V.** (2002). Glial-neuronal-endothelial interactions are involved in the control of GnRH secretion. *J. Neuroendocrinol.* **14**, 247-255.

**Radovick, S., Levine, J.E. and Wolfe, A.** (2012). Estrogenic regulation of the GnRH neuron. *Front. Endocrinol.* **3**(52), 1-11.

**Roa, J., Aguilar, E., Dieguez, C., Pinilla, L. and Tena-Sempere, M.** (2008). New frontiers in kisspeptin/GPR54 physiology as fundamental gatekeepers of reproductive function. *Front. Neuroendocrin.* **29**, 48-69.

**Rocha, A., Zanuy, S., Carrillo, M. and Gómez, A.** (2009). Seasonal changes in gonadal expression of gonadotropin receptors, steroidogenic acute regulatory protein and steroidogenic enzymes in the European sea bass. *Gen. Comp. Endocrinol.* **162**, 265-275.

**Rodríguez, L., Begtashi, I., Zanuy, S. and Carrillo, M.** (2000). Development and validation of an enzyme immunoassay for testosterone: effects of photoperiod on plasma testosterone levels and gonadal development in male sea bass (*Dicentrarchus labrax* L.) at puberty. *Fish Physiol. Biochem.* **23**, 141-150.

**Rodríguez, L., Begtashi, I., Zanuy, S., Shaw, M. and Carrillo, M.** (2001). Changes in plasma levels of reproductive hormones during first sexual maturation in European male sea bass (*Dicentrarchus labrax* L.) under artificial day lengths. *Aquaculture.* **202**(3-4), 235-248.

**Saligaut, C., Linard, B., Mañanós, E.L., Kah, O., Breton, B. and Govoroun, M.** (1998). Release of pituitary gonadotrophins GtH I and GtH II in the rainbow trout (*Oncorhynchus mykiss*): modulation by estradiol and catecholamines. *Gen. Comp. Endocrinol.* **109**, 302-309.

**Servili, A., Le Page, Y., Leprince, J., Caraty, A., Escobar, S., Parhar, I.S., Seong, J.Y., Vaudry, H. and Kah, O.** (2011). Organization of two independent kisspeptin systems derived from evolutionary-ancient kiss genes in the brain of zebrafish. *Endocrinology.* **152**(4), 1527-1540.

**Shibata, M., Friedman, R.L., Ramaswamy, S. and Plant, T.M.** (2007). Evidence that down regulation of hypothalamic *Kiss-1* expression is involved in the negative feedback action of testosterone to regulate luteinising hormone secretion in the adult male rhesus monkey (*Macaca mulatta*). *J. Neuroendocrinol.* **19**(6), 432-438.

**Smith, J.T., Dungan, H.M., Stoll, E.A., Gottsch, M.L., Braun, R.E., Eacker, S.M., Clifton, D.K. and Steiner, R.A.** (2005a). Differential regulation of *Kiss-1* mRNA expression by sex steroids in the brain of the male mouse. *Endocrinology.* **146**(7), 2976-2984.

**Smith, J.T., Cunningham, M.J., Rissman, E.F., Clifton, D.K. and Steiner, R.A.** (2005b). Regulation of *Kiss1* gene expression in the brain of the female mouse. *Endocrinology.* **146**(9), 3686-3692.

**Smith, J.T., Popa, S.M., Clifton, D.K., Hoffman, G.E. and Steiner, R.A.** (2006). *Kiss1* neurons in the forebrain as central processors for generating the preovulatory luteinizing hormone surge. *J. Neurosci.* **26**(25), 6687-6694.

**Smith, J.T., Clay, C.M., Caraty, A. and Clarke, I.J.** (2007). *Kiss-1* messenger ribonucleic acid expression in the hypothalamus of the ewe is regulated by sex steroids and season. *Endocrinology.* **148**(3), 1150-1157.

**Smith, J.T.** (2009). Sex steroid control of hypothalamic *Kiss1* expression in sheep and rodents: Comparative aspects. *Peptides.* **30**(1), 94-102.

**Sokal, R.R. and Rohlf, F.J.** (1981). Biometry. The principles and practice of statistics in biological research (2<sup>nd</sup> ed), 859 pp. W.H. Freeman, NY.

**Tena-Sempere, M.** (2010). Kisspeptin signaling in the brain: Recent developments and future challenges. *Mol. Cell. Endocrinol.* **324**, 164-169.

**Zanuy, S., Carrillo, M., Mateos, J., Trudeau, V. and Kah, O.** (1999). Effects of sustained administration of testosterone in pre-pubertal sea bass (*Dicentrarchus labrax*). *Aquaculture.* **177**, 21-35.

## Figures

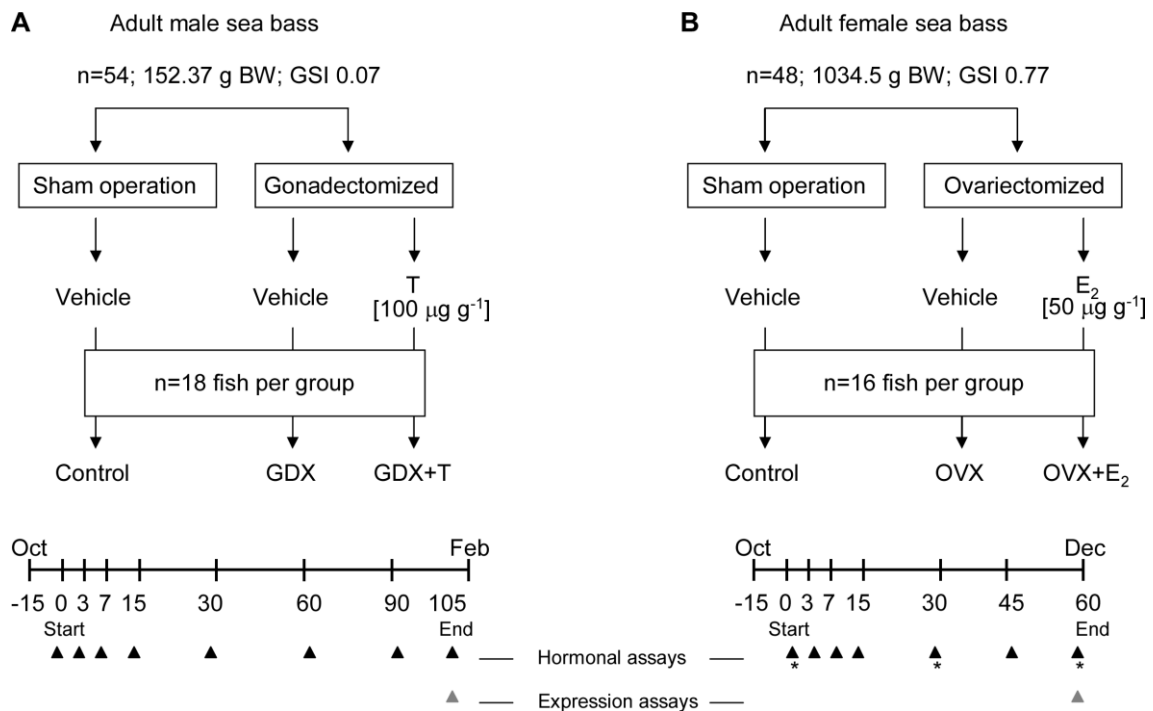

**Figure 1. Time chart of the experimental procedure to evaluate the effects of castration and testosterone (T) and estradiol (E<sub>2</sub>) implantation in adult male (A) and female (B) sea bass, respectively, during gonadal recrudescence.** Males received one silastic implant, either empty or containing a T dose of 100 µg per gram of fish (Experiment 1), while females were administered 50 µg of E<sub>2</sub> per gram of fish (Experiment 2). The day on which implants were inserted was considered to be the start of the experiments (day 0), which lasted until day 105 (February, Experiment 1) and day 60 (December, Experiment 2) post-treatment, coinciding with advanced gametogenesis in this species. Samples for hormonal analysis were collected on the days after implantation indicated by black arrowheads. Asterisks represent blood collection and analysis for plasma levels of Lh in females. Samples for mRNA expression assays are indicated by grey arrowheads.

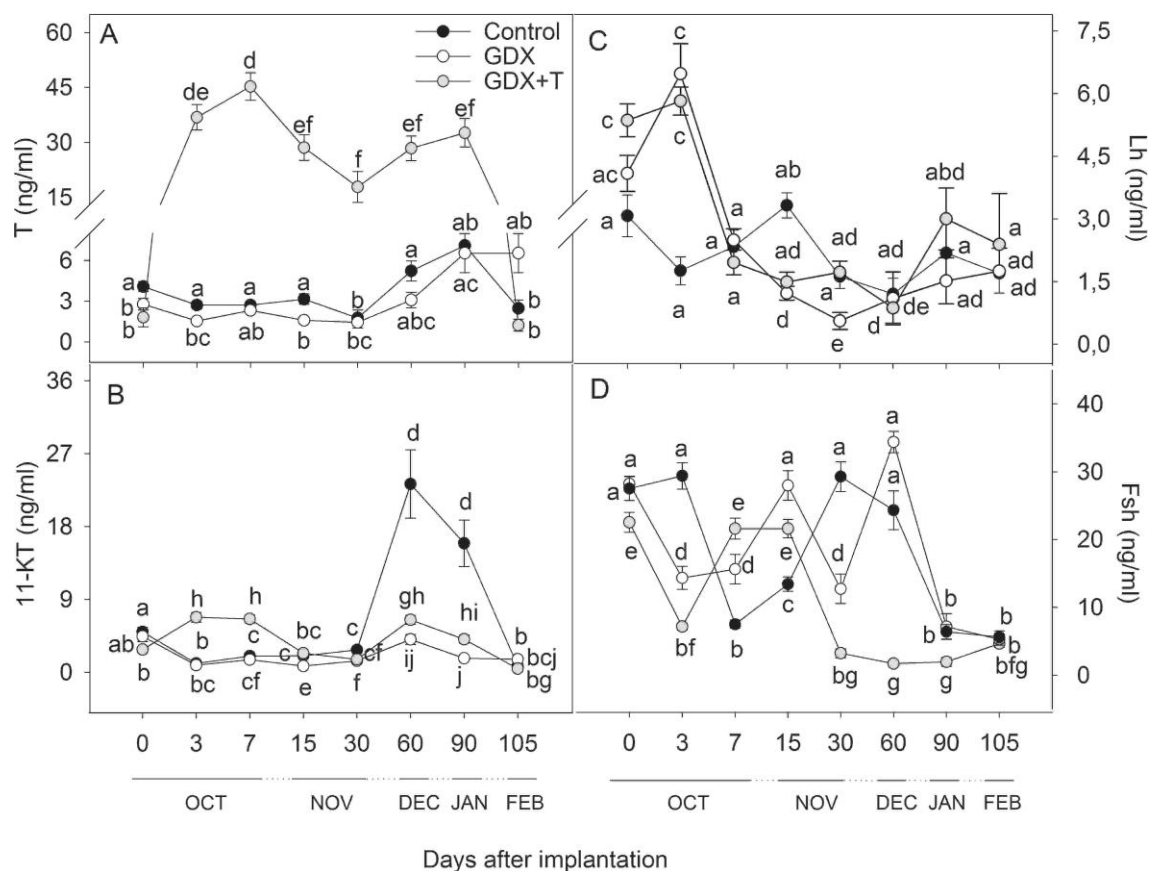

**Figure 2.** Time courses of the mean ( $\pm$  SEM) concentration of (A) testosterone (T), (B) 11-ketotestosterone (11-KT), (C) luteinizing hormone (Lh) and (D) follicle-stimulating hormone (Fsh) in the circulation of gonad-intact (Control, black points), castrated (GDX, white points) and castrated males receiving T replacement ( $100 \mu\text{g g}^{-1}$ ) (GDX+T, grey points) in sea bass. Different lowercase letters indicate significant differences ( $P < 0.05$ ) among experimental groups or within the same group throughout the experiment ( $n = 6-18$  per group and sampling point).

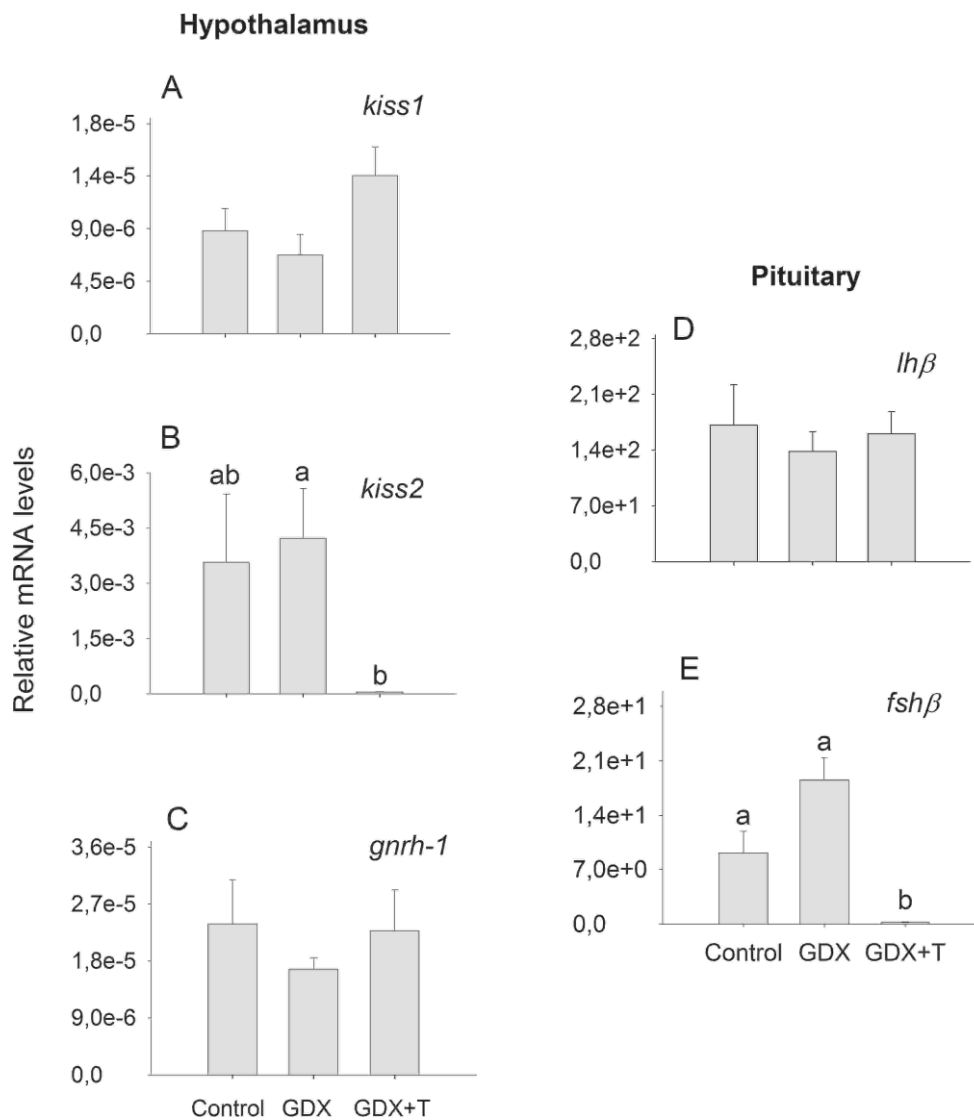

**Figure 3. Effect of castration and testosterone (T) replacement treatment on hypothalamic *kiss1* (A), *kiss2* (B) and *gnrh-1* (C) mRNA levels and pituitary *lhβ* (D) and *fshβ* (E) mRNA levels in male sea bass, as determined by qRT-PCR.** Changes in expression levels were evaluated on day 105 (February) after treatment, coinciding with advanced gametogenesis in males (n = 6-8 per group). Males were either subjected to sham-operation (testis intact, Control group), gonadectomized (GDX group) or gonadectomized and received T replacement (100  $\mu\text{g g}^{-1}$ ) (GDX+T group). Different letters indicate significant differences ( $P < 0.05$ ) among experimental groups.

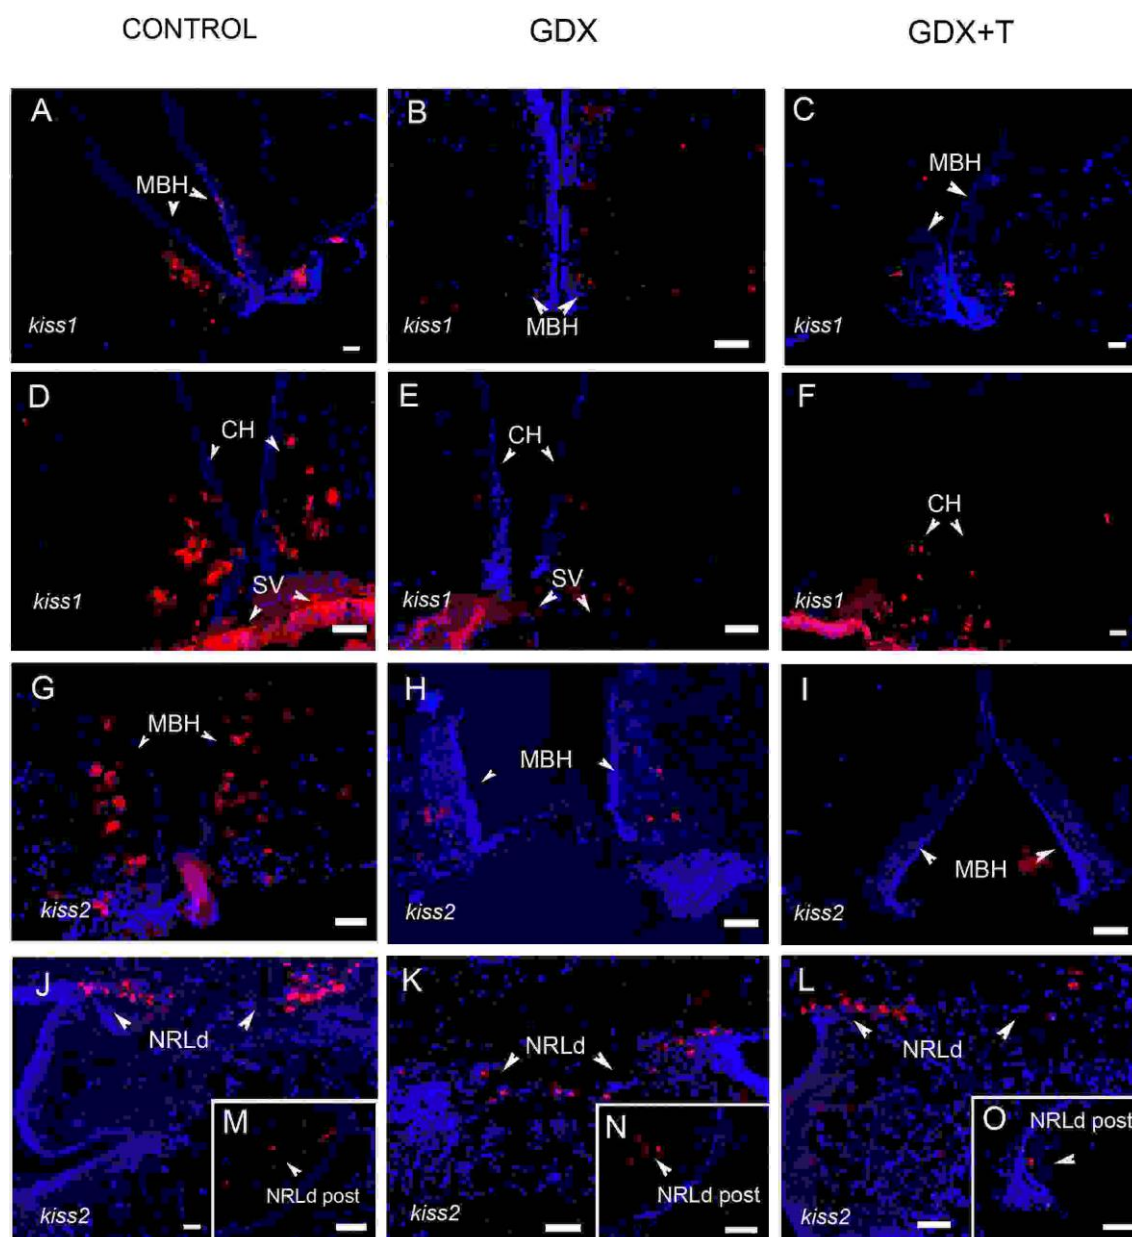

**Figure 4.** Representative pictures of the *in situ* hybridization results showing *kiss1* and *kiss2* mRNA-expressing cells (in red) on transverse sections in the brain of male sea bass ( $n = 2$  per group), according to the physiological status of the animals. ISH analysis was performed on day 105 (February) post-treatment, coinciding with advanced gametogenesis in this species. Males were either subjected to sham-operation (testis intact, Control group), gonadectomized (GDX group) or gonadectomized and received T replacement ( $100 \mu\text{g/g}$ ) (GDX+T group). Expression of *kiss1* mRNAs in the mediobasal hypothalamus (MBH) of control (**A**), GDX (**B**) and



GDX+T (**C**), and in the caudal hypothalamus (CH) of control (**D**), GDX (**E**) and GDX+T (**F**) fish. Expression of *kiss2* mRNAs in the MBH of control (**G**), GDX (**H**) and GDX+T (**I**), and in the nucleus of the lateral recess (NRLd) and posterior part of NRLd of control (**J-M**), GDX (**K-N**) and GDX+T (**L-O**) fish, respectively. SV, saccus vasculosus. Scale bars = 30  $\mu$ m.

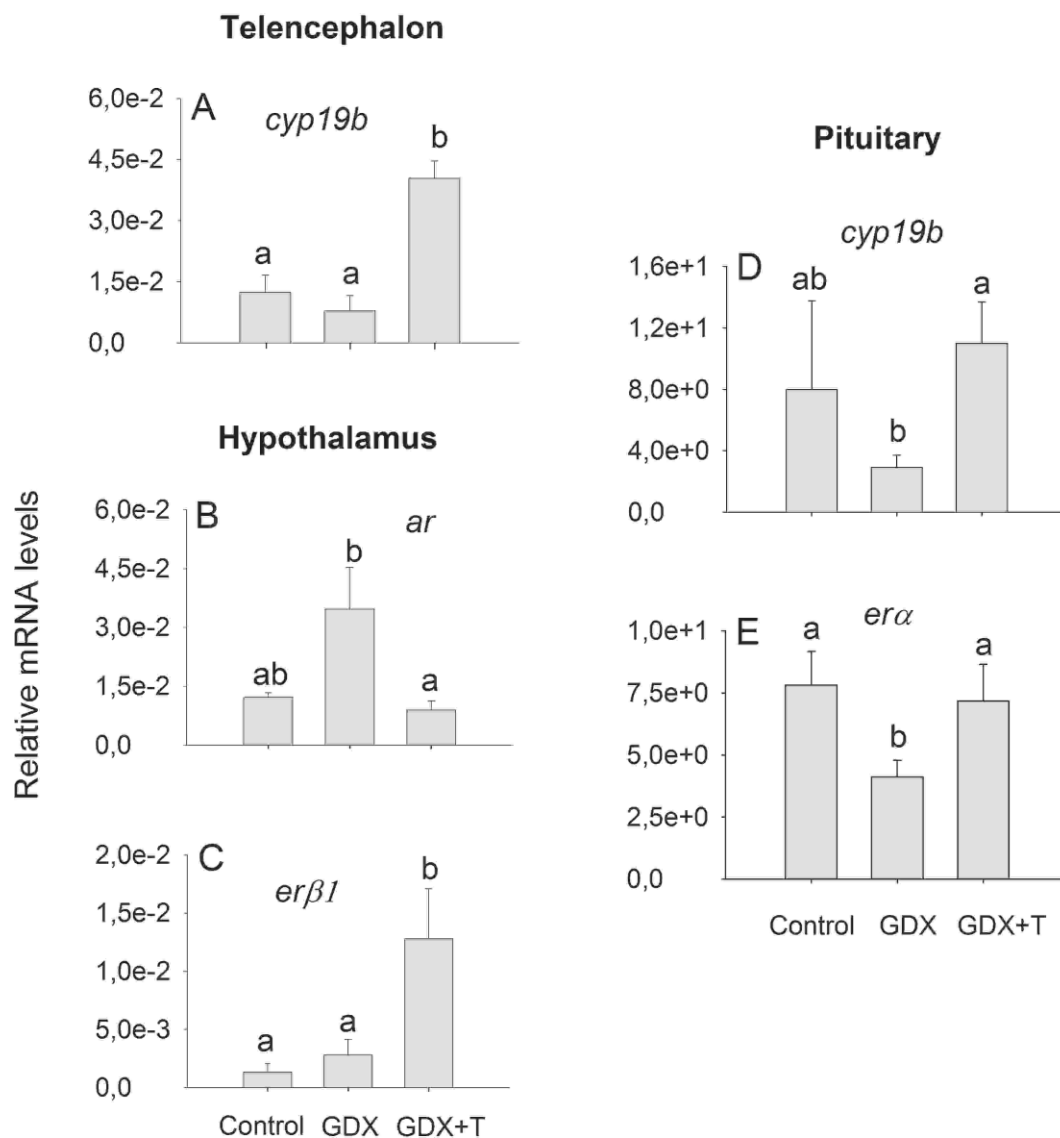

**Figure 5.** Effect of castration and testosterone (T) replacement treatment on mRNA levels of brain aromatase (*cyp19b*) in the telencephalon (A), androgen receptor (*ar*) in the hypothalamus (B), estrogen receptor  $\beta 1$  (*erβ1*) in the hypothalamus (C) and *cyp19b* (D) and *erα* (E) in the pituitary, as determined by qRT-PCR (see Fig. 3 legend).

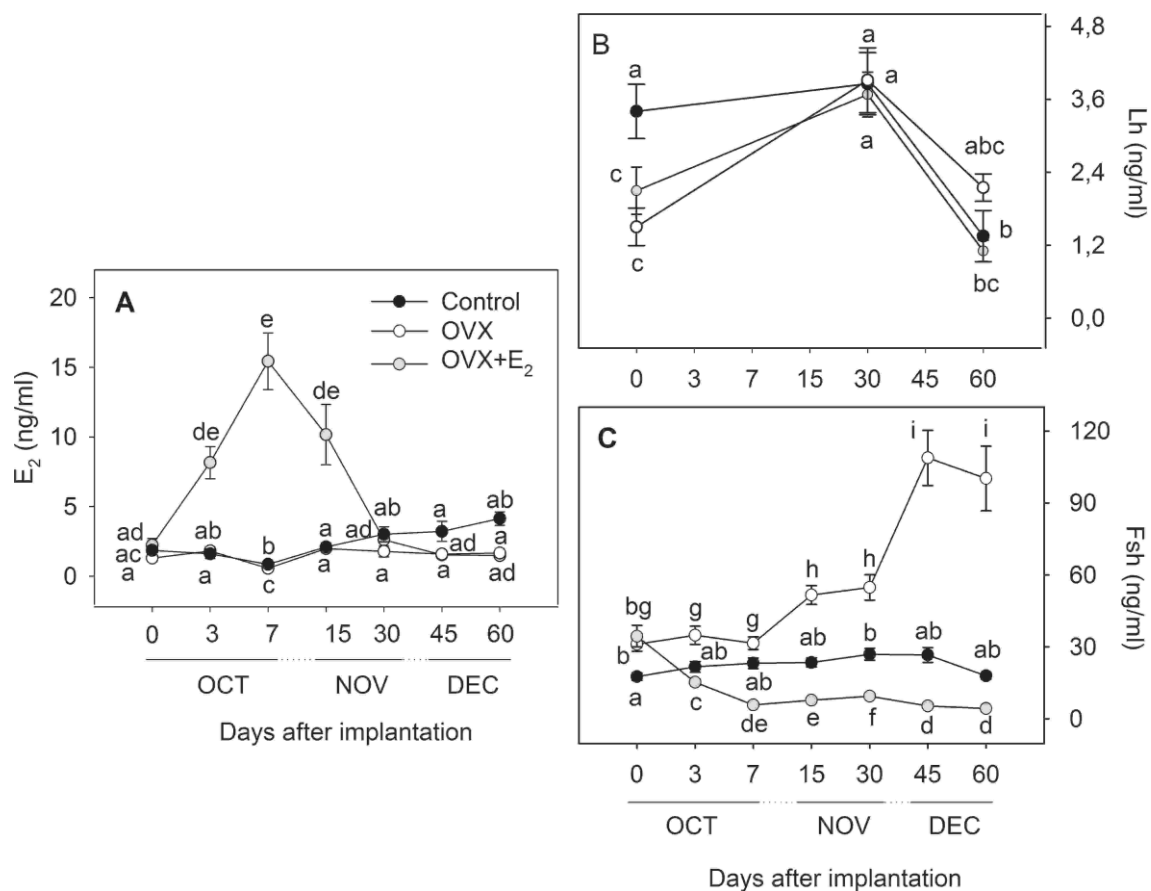

**Figure 6.** Time courses of the mean ( $\pm$  SEM) concentration of (A) estradiol (E<sub>2</sub>), (B) luteinizing hormone (Lh) and (C) follicle-stimulating hormone (Fsh) in the circulation of gonad-intact females (Control, black points), ovariectomized (OVX, white points), and ovariectomized and receiving E<sub>2</sub> replacement (50  $\mu$ g g<sup>-1</sup>) (OVX+ E<sub>2</sub>, grey points) in sea bass. Different lowercase letters indicate significant differences ( $P < 0.05$ ) among experimental groups or within the same group throughout the experiment ( $n = 4-15$  per group and sampling point).

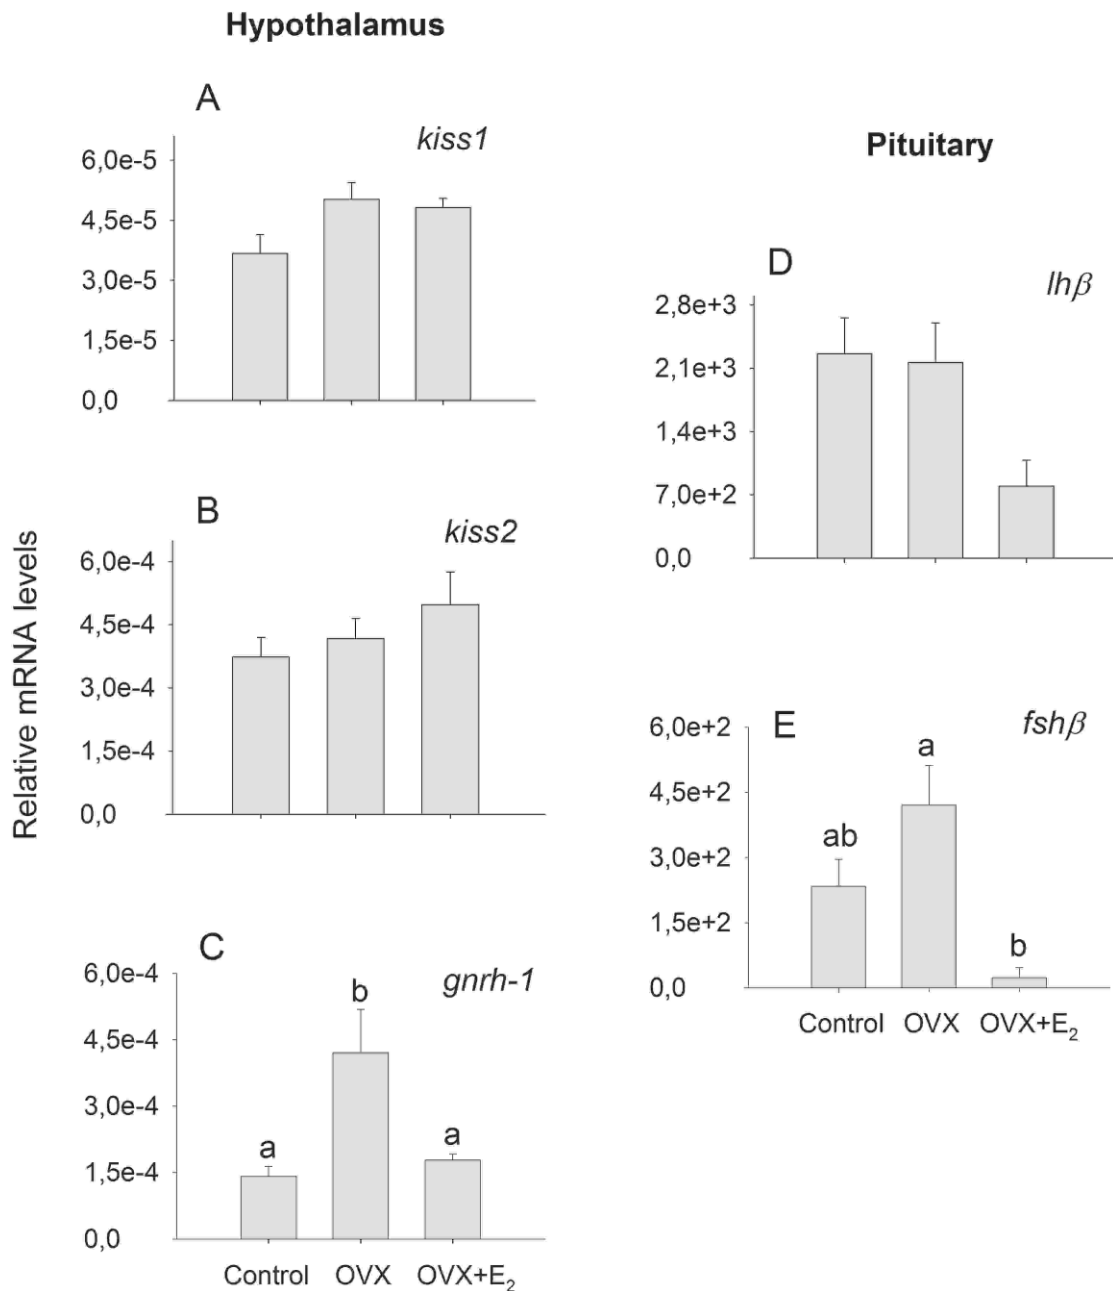

**Figure 7. Effect of castration and estradiol (E<sub>2</sub>) replacement treatment on hypothalamic *kiss1* (A), *kiss2* (B) and *gnrh-1* (C) mRNA levels and pituitary *lhβ* (D) and *fshβ* (E) mRNA levels in female sea bass, as determined by qRT-PCR.** Changes in expression levels were evaluated on day 60 (December) after treatment, coinciding with advanced gametogenesis in females (n = 4-6 per group). Females were either subjected to sham-operation (ovary intact, Control group), ovariectomized (OVX group) or ovariectomized and received E<sub>2</sub> replacement (50 μg g<sup>-1</sup>) (OVX+E<sub>2</sub> group).

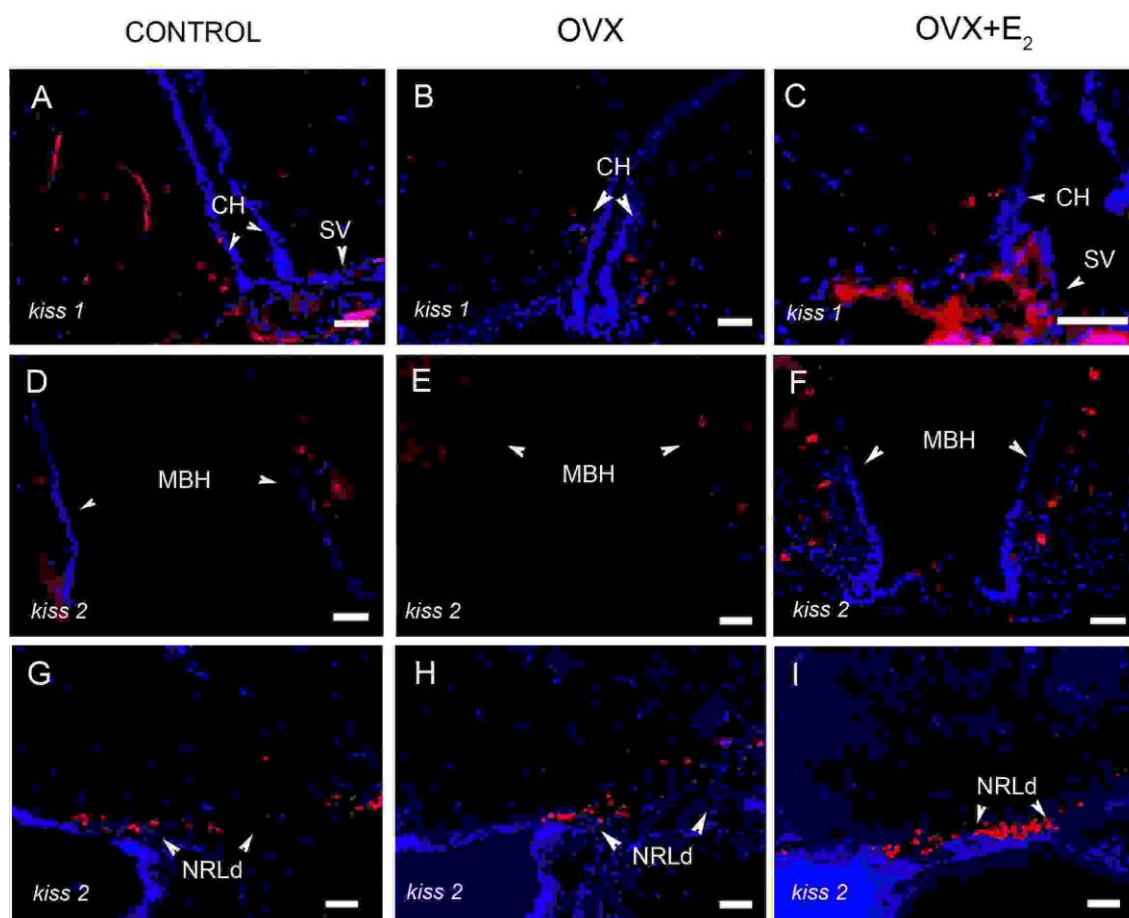

**Figure 8.** Representative pictures of the *in situ* hybridization results showing *kiss1* and *kiss2* mRNA-expressing cells (in red) on transverse sections in the brain of female sea bass ( $n = 2$  per group), according to the physiological status of the animals. ISH analysis was performed on day 60 (December) after treatment, coinciding with advanced gametogenesis in this species. Females were either subjected to sham-operation (ovary intact, Control group), ovariectomized (OVX group) or ovariectomized and received  $E_2$  replacement ( $50 \mu\text{g g}^{-1}$ ) (OVX+ $E_2$  group). Expression of *kiss1* mRNAs in the caudal hypothalamus (CH) of control (A), OVX (B) and OVX+ $E_2$  (C) fish. Expression of *kiss2* mRNAs in the mediobasal hypothalamus (MBH) of control (D), OVX (E) and OVX+ $E_2$  (F), and in the dorsal part of the nucleus of the lateral recess (NRLd) of control (G), OVX (H) and OVX+ $E_2$  (I) fish. SV, saccus vasculosus. Scale bars =  $30 \mu\text{m}$ .

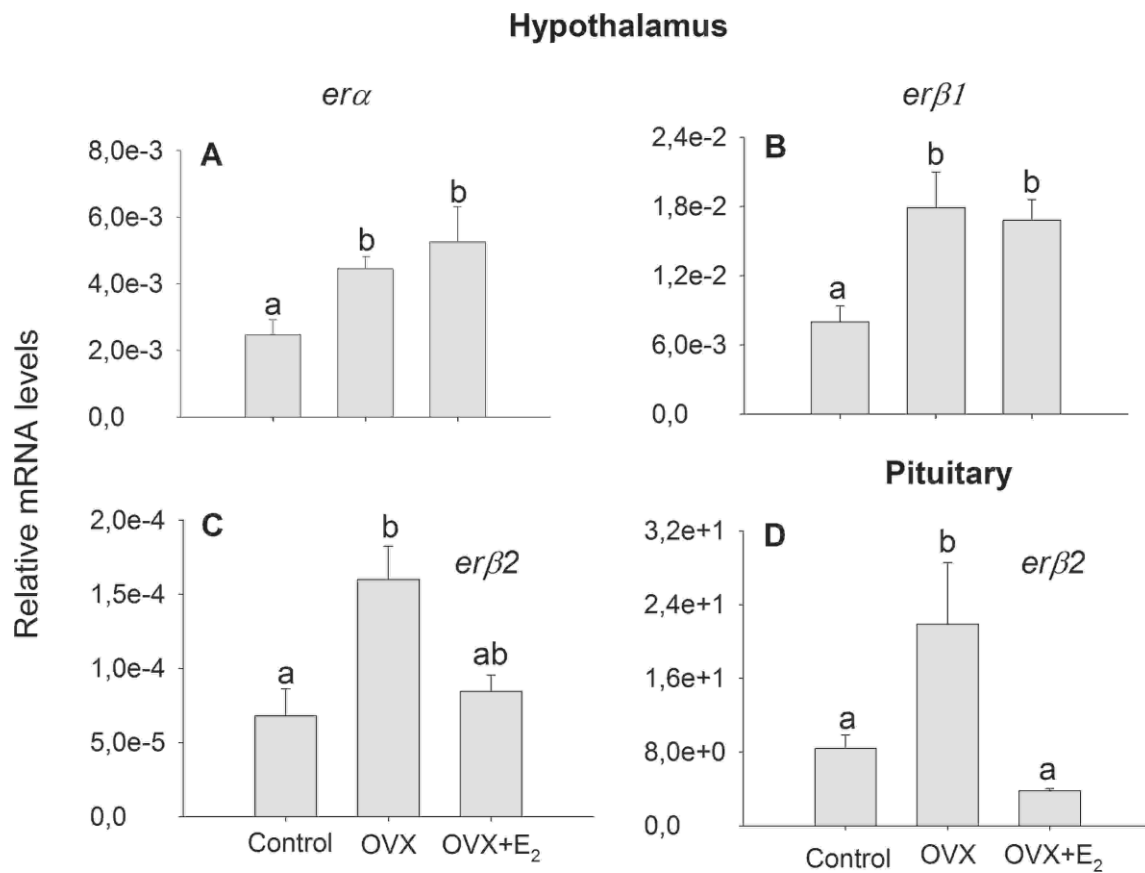

**Figure 9.** Effect of ovariectomy and estradiol (E<sub>2</sub>) replacement treatment on mRNA levels of hypothalamic estrogen receptors (A) *erα*, (B) *erβ1*, (C) *erβ2* and the pituitary *erβ2* (D), as determined by qRT-PCR (see Fig. 7 legend).

**Table 1.** Summary of the gene expression changes in the brain by RT-PCR after castration and testosterone (T) and estradiol (E<sub>2</sub>) replacement in males and females, respectively, in the European sea bass.

| Tissue        | Gene               | Males   |     |       | Females |     |                    |
|---------------|--------------------|---------|-----|-------|---------|-----|--------------------|
|               |                    | Control | GDX | GDX+T | Control | OVX | OVX+E <sub>2</sub> |
| Telencephalon | <i>cyp19b</i>      | - -     | - - | + +   | n.a     | n.a | n.a                |
|               | <i>kiss1</i>       | n.s     | n.s | n.s   | n.s     | n.s | n.s                |
|               | <i>kiss2</i>       | +       | + + | - -   | n.s     | n.s | n.s                |
|               | <i>gpr54-1b</i>    | n.s     | n.s | n.s   | n.s     | n.s | n.s                |
|               | <i>gpr54-2b</i>    | n.s     | n.s | n.s   | n.s     | n.s | n.s                |
| Hypothalamus  | <i>gnrh-1</i>      | n.s     | n.s | n.s   | - -     | + + | - -                |
|               | <i>cyp19b</i>      | n.s     | n.s | n.s   | n.a     | n.a | n.a                |
|               | <i>era</i>         | n.s     | n.s | n.s   | - -     | + + | + +                |
|               | <i>erβ1</i>        | - -     | - - | + +   | - -     | + + | + +                |
|               | <i>erβ2</i>        | n.s     | n.s | n.s   | - -     | + + | -                  |
|               | <i>ar</i>          | -       | + + | - -   | n.a     | n.a | n.a                |
|               | <i>kiss1</i>       | n.d     | n.d | n.d   | n.d     | n.d | n.d                |
|               | <i>kiss2</i>       | n.s     | n.s | n.s   | n.s     | n.s | n.s                |
|               | <i>gpr54-1b</i>    | n.s     | n.s | n.s   | n.s     | n.s | n.s                |
|               | <i>gpr54-2b</i>    | n.s     | n.s | n.s   | n.s     | n.s | n.s                |
| Pituitary     | <i>gnrhr-II-1a</i> | n.s     | n.s | n.s   | n.s     | n.s | n.s                |
|               | <i>lhβ</i>         | n.s     | n.s | n.s   | n.s     | n.s | n.s                |
|               | <i>fshβ</i>        | + +     | + + | - -   | +       | + + | - -                |



|               |     |     |     |     |     |     |
|---------------|-----|-----|-----|-----|-----|-----|
| <i>cyp19b</i> | +   | - - | ++  | n.a | n.a | n.a |
| <i>era</i>    | ++  | - - | ++  | n.s | n.s | n.s |
| <i>erβ1</i>   | n.s | n.s | n.s | n.s | n.s | n.s |
| <i>erβ2</i>   | n.s | n.s | n.s | - - | ++  | - - |
| <i>ar</i>     | n.s | n.s | n.s | n.a | n.a | n.a |

In each sex, the three columns correspond to the experimental groups analysed in this study: Control, castrated (GDX) and castrated males receiving T replacement ( $100 \mu\text{g g}^{-1}$ ) (GDX+T) and gonad-intact females (Control), ovariectomized (OVX) and ovariectomized and receiving E<sub>2</sub> replacement ( $50 \mu\text{g g}^{-1}$ ) (OVX+ E<sub>2</sub>) in sea bass. The action of sex steroids in each experimental group is indicated as follows: (++) positive; (- -) negative; (+) positive but without significant differences; (-) negative but without significant differences; (n.s) not-significant; (n.d) not-detected and (n.a) not-analyzed.
